# Supplementary material for: Valorisation of sulphonated lignin as a dye for the sustainable colouration of wool fabric using sustainable mordanting agents: enhanced colour yield, colourfastness, and functional properties
Source: Royal Society of Chemistry journal article supplement (doi:10.1039/d3su00402c), 2024-01-01
Supplement: d3su00402c1.pdf [file d3su00402c1.pdf]

## Supplementary Information

Valorisation of sulphonated lignin as a dye for the sustainable colouration of wool fabric using sustainable mordanting agents: Enhanced colour yield, colourfastness, and functional properties

Mohammad Mahbubul Hassan \*

### Index

#### List of Figures

**Fig. S1.** UV-vis spectra of aqueous solution of SL.

**Fig. S2.** Effect of Cu (top) and Fe (bottom) mordant concentrations (%ows) on the depth of shades of wool fabrics treated with 3% (owf) SL.

**Fig. S3.** Elemental distribution of C, N, O, S, and Al/Cu/Fe/Ca elements on wool fibre surface dyed with SL using various mordanting agents.

**Fig. S4.** ATR-FTIR spectra of wool fabric dyed with 1% owf SL in combination with various mordanting agents using their concentrations of 25% (ows).

#### List of Tables

**Table. S1.** Effect of mordanting agent concentration on *CIE L\*a\*b\** values and colour difference compared to the undyed control of wool fabrics dyed 3% (owf) SL at 98 °C for 60 min.

**Table S2.** Colourfastness to washing of wool fabric treated with 3% (owf) SL at various conditions.

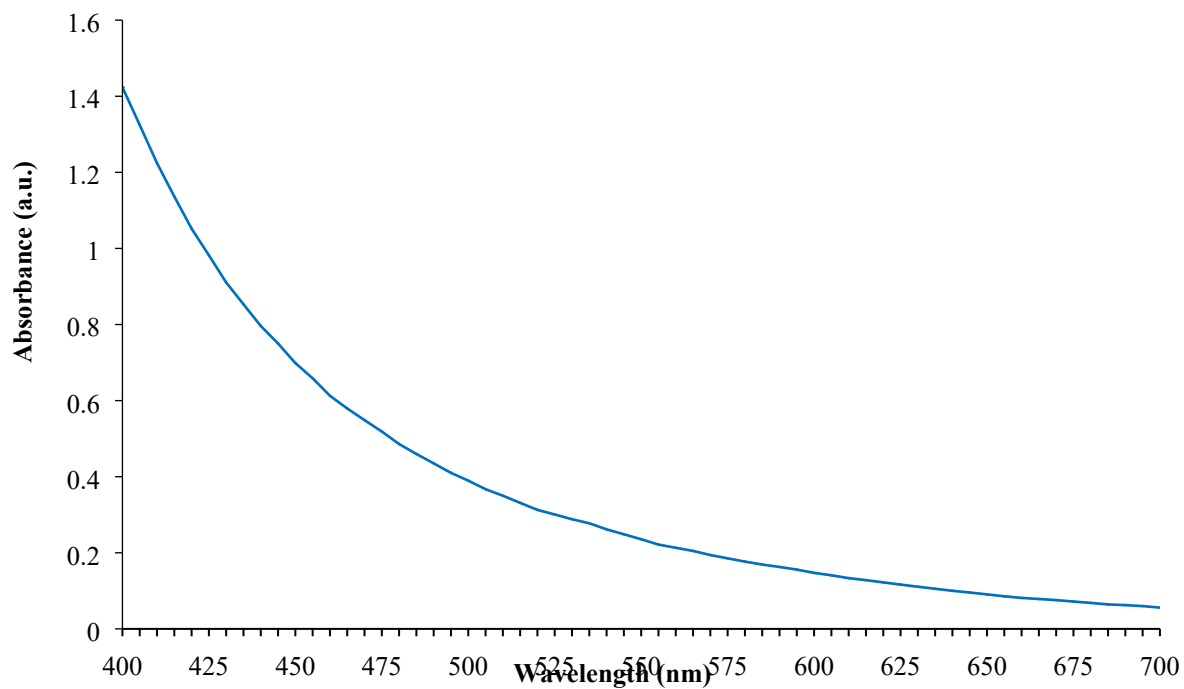

**Fig. S1.** UV-vis spectra of aqueous solution of SL.

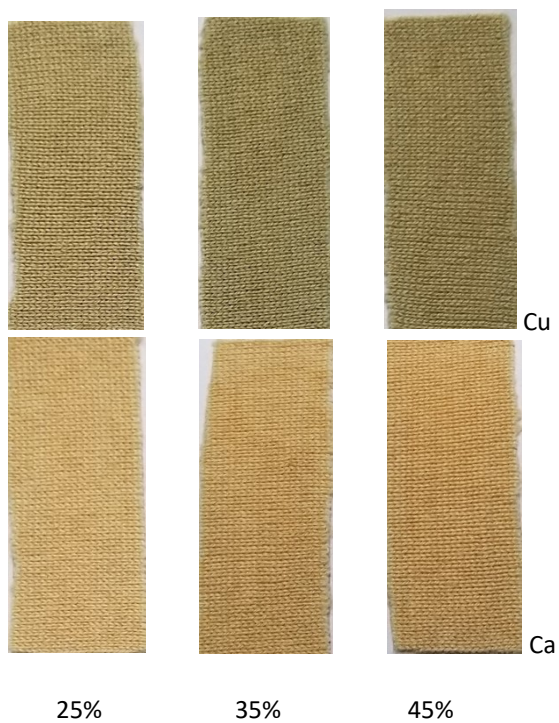

**Fig. S2.** Effect of Cu (top) and Ca (bottom) mordant concentrations (ows) on the depth of shade of wool fabrics treated with 3% (owf) SL.

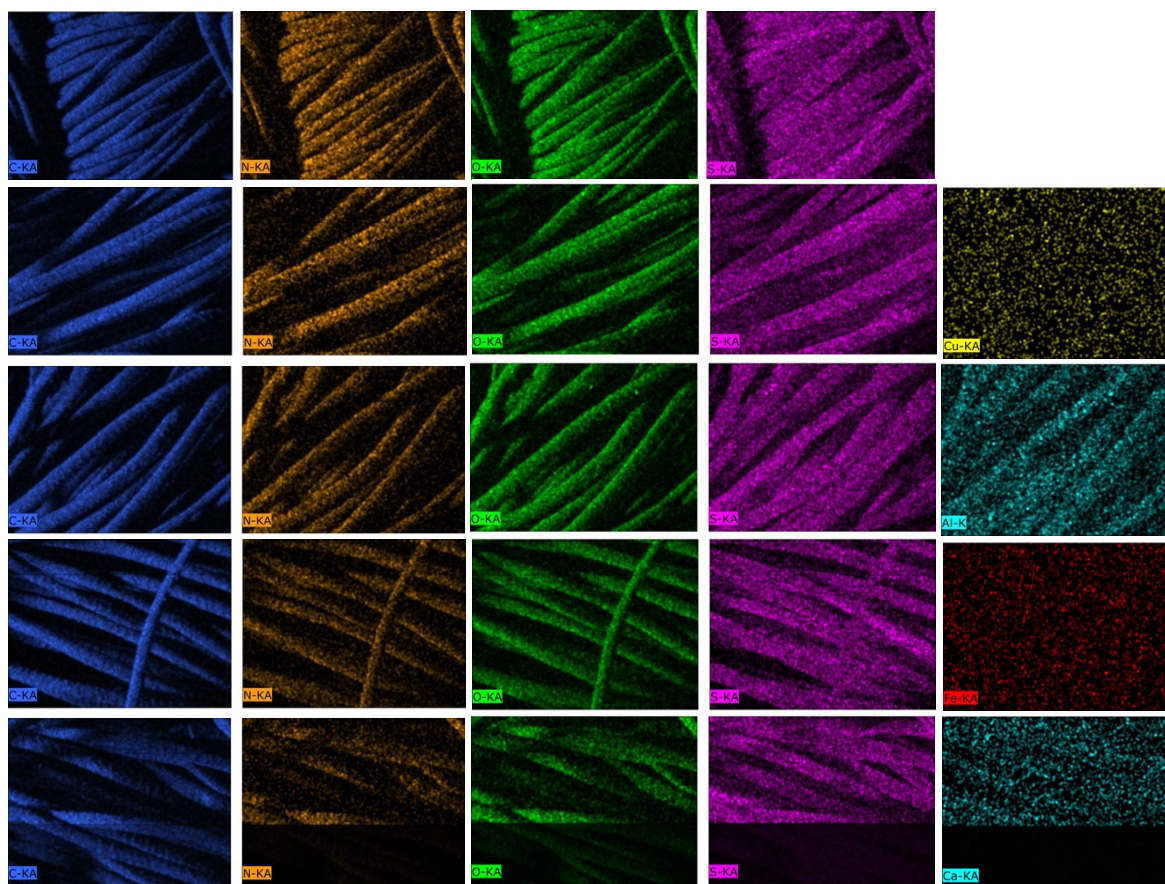

**Fig. S3.** Elemental distribution of C, N, O, S, and Al/Cu/Fe/Ca elements on wool fibre surface dyed with SL using various mordanting agents.

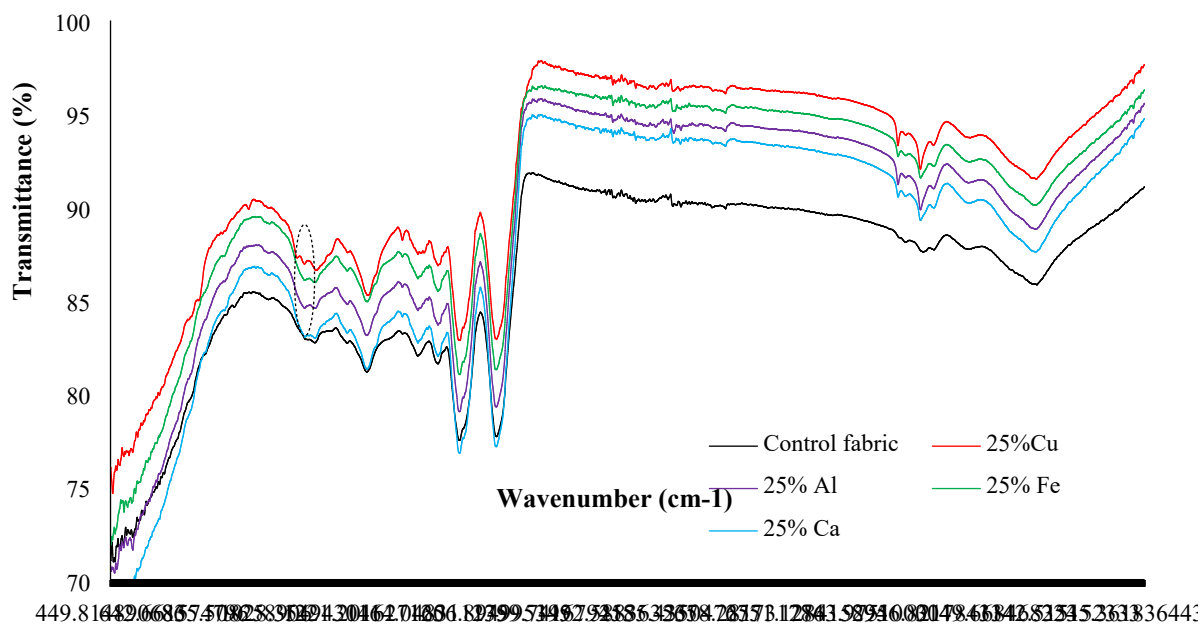

**Fig. S4.** ATR-FTIR spectra of wool fabric dyed with 1% (owf) SL in combination with various mordanting agents using their concentrations of 25% (ows).

**Table. S1.** Effect of mordanting agent concentration (%ows) on *CIE L\*a\*b\** values and colour difference compared to the undyed control of wool fabrics dyed 3% (owf) SL at 98 °C for 60 min.

| Mordanting agent (% ows) | Mordanting agent | <i>CIE L*a*b*</i> values |           |            | $\Delta E$ | Colour strength (K/S) |
|--------------------------|------------------|--------------------------|-----------|------------|------------|-----------------------|
|                          |                  | <i>L*</i>                | <i>a*</i> | <i>b*</i>  |            |                       |
| 25                       | Cu               | 67.36±0.12               | 1.89±0.07 | 21.37±0.08 | 26.82      | 3.13                  |
| 35                       |                  | 65.44±0.10               | 0.54±0.05 | 21.48±0.05 | 28.69      | 3.28                  |
| 45                       |                  | 66.90±0.14               | 1.07±0.07 | 21.30±0.06 | 27.69      | 3.60                  |
| 25                       | Ca               | 74.84±0.09               | 6.08±0.04 | 24.22±0.07 | 21.80      | 2.16                  |
| 35                       |                  | 74.81±0.11               | 6.35±0.05 | 24.67±0.04 | 22.20      | 2.20                  |
| 45                       |                  | 74.75±0.15               | 6.45±0.03 | 25.06±0.05 | 22.46      | 2.30                  |

**Table S2.** Colourfastness to washing of wool fabric treated with 3% (owf) SL at various conditions.

| Mordants<br>(% ows) | Colour<br>change | Cellulose<br>diacetate | Bleached<br>cotton | Polyamide | Polyester | Acrylic | Silk |
|---------------------|------------------|------------------------|--------------------|-----------|-----------|---------|------|
| Cu                  |                  |                        |                    |           |           |         |      |
| 25                  | 4                | 4                      | 4                  | 4         | 4         | 4       | 4    |
| 35                  | 4-5              | 4                      | 4                  | 4         | 4         | 4       | 4    |
| 45                  | 4                | 4                      | 4                  | 4         | 4         | 4       | 4    |
| Fe                  |                  |                        |                    |           |           |         |      |
| 25                  | 4                | 4                      | 4                  | 3-4       | 4-5       | 4       | 4-5  |
| 35                  | 4                | 4                      | 4                  | 3-4       | 4-5       | 4       | 4-5  |
| 45                  | 4-5              | 4                      | 4                  | 3-4       | 4-5       | 4       | 4-5  |
